## RESEARCH ARTICLE

# Socioeconomic inequality in knowledge about HIV/AIDS over time in Ethiopia: A population-based study

Aklilu Endalamaw<sup>1,2\*</sup>, Charles F. Gilks<sup>1</sup>, Fentie Ambaw<sup>2</sup>, Resham B. Khatri<sup>1,3</sup>, Yibeltal Assefa<sup>1</sup>

**1** School of Public Health, The University of Queensland, Brisbane, Australia, **2** College of Medicine and Health Sciences, Bahir Dar University, Bahir Dar, Ethiopia, **3** Health Social Science and Development Research Institute, Kathmandu, Nepal

\* [yaklilu12@gmail.com](mailto:yaklilu12@gmail.com)

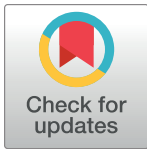

## OPEN ACCESS

**Citation:** Endalamaw A, Gilks CF, Ambaw F, Khatri RB, Assefa Y (2023) Socioeconomic inequality in knowledge about HIV/AIDS over time in Ethiopia: A population-based study. *PLOS Glob Public Health* 3(10): e0002484. <https://doi.org/10.1371/journal.pgph.0002484>

**Editor:** Sarah E. Brewer, University of Colorado Denver - Anschutz Medical Campus; University of Colorado - Anschutz Medical Campus, UNITED STATES

**Received:** June 5, 2023

**Accepted:** September 23, 2023

**Published:** October 31, 2023

**Peer Review History:** PLOS recognizes the benefits of transparency in the peer review process; therefore, we enable the publication of all of the content of peer review and author responses alongside final, published articles. The editorial history of this article is available here: <https://doi.org/10.1371/journal.pgph.0002484>

**Copyright:** © 2023 Endalamaw et al. This is an open access article distributed under the terms of the [Creative Commons Attribution License](https://creativecommons.org/licenses/by/4.0/), which permits unrestricted use, distribution, and reproduction in any medium, provided the original author and source are credited.

**Data Availability Statement:** All data underlying the findings are provided in the submitted

## Abstract

Socioeconomic inequality in comprehensive knowledge about HIV/AIDS can hinder progress towards ending the epidemic threat of this disease. To address the knowledge gap, it is essential to investigate inequality in HIV/AIDS services. This study aimed to investigate socioeconomic inequality, identify contributors, and analyze the trends in inequality in comprehensive knowledge about HIV/AIDS among adults in Ethiopia. A cross-sectional study was conducted using 2005, 2011, and 2016 population-based health survey data. The sample size was 18,818 in 2005, 29,264 in 2011, and 27,261 in 2016. Socioeconomic inequality in comprehensive knowledge about HIV/AIDS was quantified by using a concentration curve and index. Subsequently, the decomposition of the concentration index was conducted using generalised linear regression with a logit link function to quantify covariates' contribution to wealth-based inequality. The Erreygers' concentration index was 0.251, 0.239, and 0.201 in 2005, 2011, and 2016, respectively. Watching television (24.2%), household wealth rank (21.4%), ever having been tested for HIV (15.3%), and education status (14.3%) took the significant share of socioeconomic inequality. The percentage contribution of watching television increased from 4.3% in 2005 to 24.2% in 2016. The household wealth rank contribution increased from 14.6% in 2005 to 21.38% in 2016. Education status contribution decreased from 16.2% to 14.3%. The percentage contribution of listening to the radio decreased from 16.9% in 2005 to -2.4% in 2016. The percentage contribution of residence decreased from 7.8% in 2005 to -0.5% in 2016. This study shows comprehensive knowledge about HIV/AIDS was concentrated among individuals with a higher socioeconomic status. Socioeconomic-related inequality in comprehensive knowledge about HIV/AIDS is woven deeply in Ethiopia, though this disparity has been decreased minimally. A combination of individual and public health approaches entangled in a societal system are crucial remedies for the general population and disadvantaged groups. This requires comprehensive interventions according to the primary health care approach.

manuscript. Additionally, we utilized data from the Demographic Health Survey (DHS) Program, as mentioned in the manuscript. The Ethiopian demographic health survey data that we obtained from DHS was acquired through an official request made to DHS. To access the DHS Program, please visit their website at <https://dhsprogram.com/>.

**Funding:** The authors received no specific funding for this work.

**Competing interests:** The authors have declared that no competing interests exist.

## Introduction

HIV/AIDS is a global public health problem that necessitates comprehensive HIV prevention services, including knowledge-related services, and integration of HIV services into routine care [1, 2]. Knowledge-building services are associated with capacity building, social marketing, advocacy, peer- or school-based education, and community mobilization [3–5]. In addition to comprehensive HIV interventions, these services have demonstrated efficiency and effectiveness in promoting positive behavioral change [6–8], encouraging health-seeking behavior [9, 10], preventing new HIV infections, and reducing the burden of disability-adjusted life years by approximately one million [3, 4]. As a result, they are included in health care parameters and can be measured accordingly.

The Joint United Nations Program for HIV/AIDS (UNAIDS), social organizations, and health policies have utilized knowledge as a monitoring indicator in the HIV/AIDS response [11–15]. Knowledge-related specific indicators are awareness about HIV/AIDS, knowing that consistent condom use and having one uninfected sexual partner prevent HIV, responding that a healthy-looking person can have HIV/AIDS, and rejecting the misconceptions that a person can get HIV from a mosquito bite and by sharing a meal with people living with HIV [16]. These indicators have guided numerous studies in estimating comprehensive knowledge and have revealed varying levels of knowledge across populations [17, 18]. Furthermore, evidence suggests that assessing the extent and sources of socioeconomic inequality exposes hidden disparities in knowledge about HIV/AIDS [19, 20].

Investigating inequality in knowledge about HIV/AIDS offers several benefits. First, it helps to develop and provide tailored interventions by reaching individuals with low service coverage [21]. Second, it enhances individuals' health care seeking behavior [22]. Third, it promotes social justice in the community by highlighting the fair distribution of resources and opportunities among different groups [23]. Fourth, it reveals policies and practices that perpetuate disparities based on social determinants of health. This information can inform policymakers and programme officers about the necessity of targeted services to achieve universal health coverage (UHC) [24].

Universal Health Coverage is a Sustainable Development Goal 3.8 target, aiming to provide health care to everyone worldwide without financial jeopardy. Many countries have plans in place to achieve this goal [25]. For example, Ethiopia plans to increase comprehensive knowledge coverage to 90% among key and priority populations by 2025 [26]. In Ethiopia, certain studies estimated comprehensive knowledge about HIV/AIDS among young and reproductive women without considering the extent of contributors to socioeconomic inequality and changes over time [27, 28]. However, understanding how knowledge is changing within different social groups can be crucial for effective planning for future resources, leadership, and financial requirements. Social groups play a significant role as contributors, often referred to as 'the causes of the causes', and identifying the sources of socioeconomic inequality can support efforts to address these disparities [29]. For example, a study conducted in Malawi revealed that comprehensive knowledge about HIV/AIDS was concentrated among the richest group, with education being the primary contributor to socioeconomic inequality [20]. Previous studies, including those conducted in Ethiopia, have not attempted to identify sources and trends of inequality in knowledge about HIV/AIDS.

The study was conducted in Ethiopia, one of Africa's most populated countries, with a population of about 126 million [30]; of which, 21.3% are urban residents [31]. Ethiopia ranks 153<sup>rd</sup> out of 167 countries in the Prosperity Index [32]. In Ethiopia, HIV/AIDS is the 6<sup>th</sup> and 13<sup>th</sup> leading cause of mortality among females and males, respectively [33]. Women are at a higher risk of HIV infection, with approximately 0.36 million women and 0.22 million men living with HIV in Ethiopia [34].

This study contributes to the literature gap regarding inequality in comprehensive knowledge about HIV/AIDS. The objective of this study was to assess the status and contributing factors of socioeconomic inequality in knowledge about HIV/AIDS over time in Ethiopia.

## Methods

### Study setting, design, sample size and data source

The current study is reported based on the Strengthening the Reporting of Observational Studies in Epidemiology Statement: guidelines for reporting observational studies as presented in [S1 Checklist](#). The study represents the Ethiopian population aged 15 to 49 years old adults. Ethiopia is one of the east African countries. We used a cross-sectional design, utilizing population-based data from the Ethiopian Demographic and Health Surveys (EDHS) conducted from 2005 to 2016. Participants were selected using multistage sampling techniques. EDHS conducted two-stage cluster sampling procedures, in which samples are stratified, clustered, and selected in two stages. The base for stratification was urban and rural, which are clustered in nine regions and two city administrations [[16](#), [35](#), [36](#)]. The final sample size was 18,818 in 2005, 29,264 in 2011, and 27,261 in 2016. [Fig 1](#) displays the flow chart of the sample for the analysis. Enumeration areas were listed from November 2004 to January 2005, September 2010 to January 2011, and September to December 2015 for the 2005, 2011, and 2016 surveys, respectively. An enumeration area is a primary sampling unit from which households and study participants were recruited. Then, the data collection period from study participants was conducted from April to August 2005, December 2010 to June 2011, and January to June 2016, respectively, for the 2005, 2011, and 2016 reports. The data collection period refers to the time when study participants were recruited. The EDHS data is particularly suitable for health equity analysis due to it consists of the socioeconomic measurement index and other relevant variables [[16](#)]. In Ethiopia, household survey data collection was began in 2000 with the first EDHS program, which collected data on knowledge about AIDS. However, it did not include a similar knowledge measurement indicator as the subsequent surveys conducted in 2005, 2011, and 2016. Consequently, we excluded the EDHS 2000 data from the trend analysis.

### Outcome and independent variables

Comprehensive knowledge about HIV/AIDS was the outcome variable. A series of questions were used to generate the level of knowledge among adults who had ever heard of HIV/AIDS. These questions included knowing about the two most common methods to prevent HIV/AIDS infection ('consistent condom use' and 'having one uninfected sexual partner'), providing the correct answer to the question 'Can a healthy-looking person have HIV/AIDS?' and rejecting the two misconceptions about HIV/AIDS ('a person can get HIV from a mosquito bite' and 'a person can get HIV by sharing a meal with people living with HIV'). Each question has three alternatives to be answered, including: yes (coded as 1), no (coded as 0), and do not know (also coded as 0). Those who answered yes to each question were considered to have comprehensive knowledge about HIV/AIDS [[16](#), [35](#), [36](#)].

Socioeconomic and demographic variables were independent variables in the study. Socioeconomic status or living standards can be assessed using direct approaches (income, expenditure, and consumption) and proxy measures (e.g., an asset index) [[37](#)]. EDHS has been using a proxy measure (the wealth index). Variables used to estimate the wealth index were household ownership of consumer goods, household characteristics, drinking water source, and toilet facilities. The wealth index score can be calculated using principal component analysis [[38](#)], and EDHS staffs calculated it. The continuous scale of the wealth index was then categorised into poorest, poor, middle, rich, and richest quantile groups. Other variables were age in years,

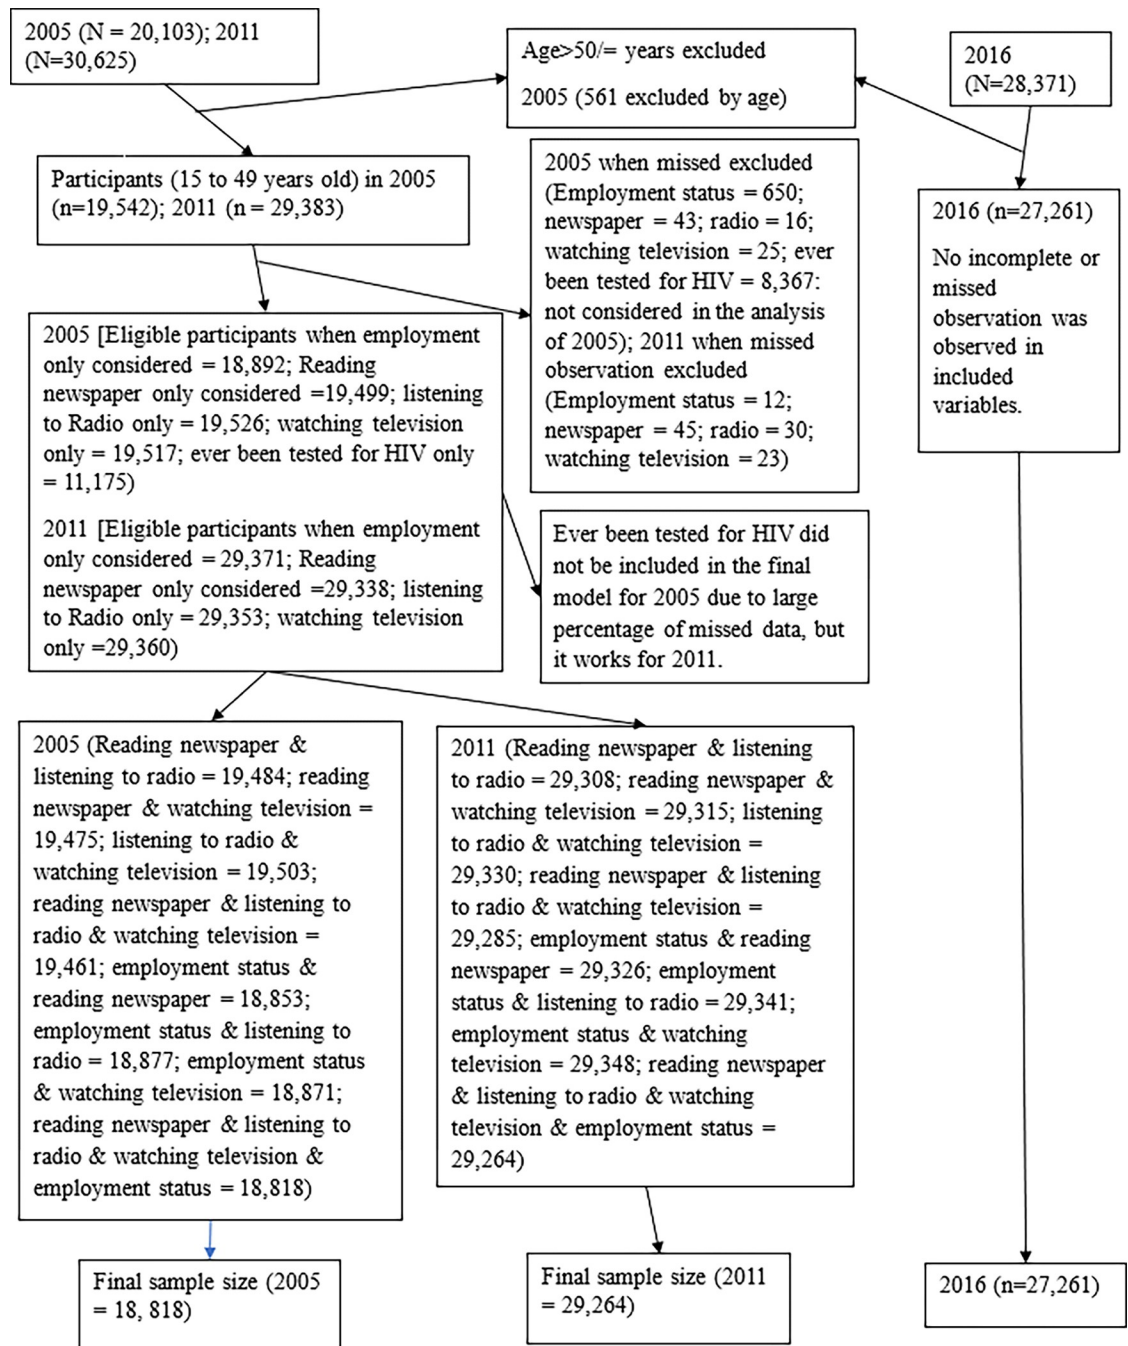

**Fig 1.** Displays the flow chart of sample for the analysis.

<https://doi.org/10.1371/journal.pgph.0002484.g001>

gender, place of resident (urban and rural), education status (no education, primary, secondary, and higher education), employment status (employed versus not employed), region (nine geographic regions: Tigray, Amhara, Oromia, Southern Nation Nationalities and People region, Afar, Somali, Benshangul-Gumuz, Harari and Gambella, and two city administrations: Addis Ababa and Dire Dawa), religion (Orthodox, Catholic, Protestant, Muslim, Traditional and others), current marital status (never married/union, married/ living with partner, and

widowed/divorced/no longer living together/separated), media exposure (reading newspaper/magazine, listening to the radio and watching television). Ever been tested for HIV was also included as a health care-related variable [16, 35, 36].

### Data quality assurance

To ensure the quality of the data, EDHS accomplished well-organized fieldwork, involving a supervisor, a field editor, interviewers, biomarker technicians, and a driver. Training and ongoing supervision were provided for the fieldwork team. Additionally, data quality was assured by using standardized and translated tools into several local languages, supervising data collectors using technology monitors, and employing appropriate software for data entry. All procedures contributed to minimizing the risk of bias. The detailed method for each EDHS is available elsewhere [16, 35, 36].

### Statistical analysis

Missing data were managed using the missing completely at random technique [39]. The multistage survey design and sampling weights were considered in the descriptive and analytical results because the EDHS data exhibits a hierarchical nature. The clustering effect (residence and region) was adjusted using 'svy' command in STATA Version 17 (Stata Corp LLC, College Station, TX, the USA 2021), by which all analyses were conducted. All frequency distribution and advanced analysis results were weighted estimates. A percentage was calculated for each measurement indicator of outcome and exploratory variables. Findings were presented in tables and figures. A concentration curve (CC), Erreygers' concentration index (ECI), and decomposition of the ECI were performed to see socioeconomic inequality and contributors. A CC displays the share of comprehensive knowledge about HIV/AIDS accounted for by the cumulative proportions of individuals in the population ranked from poorest to richest. The CC below the equality line denotes health services concentrated on the richest group, and the reverse is true. The "glcurve" statistical command was employed to generate CC [40]. Subsequently, we analysed Erreygers' concentration index (ECI) to see the degree of socioeconomic inequality. ECI is a common statistical method to assess health care inequality when dependent variable has binary outcomes [41]. The ECI is understood that it is twice the area between CC and the line of equality. The value of ECI is between  $-1$  and  $1$ ; the exact value of  $-1$  and  $1$  denotes absolute inequality, and the zero value represents equitable service distribution. A negative value indicates absolute inequality when a disproportionate concentration of comprehensive knowledge about HIV/AIDS among the poor, and a positive value denotes the reverse. It is estimated from the covariance between comprehensive knowledge about HIV/AIDS, and the fractional rank of the study participant by wealth index. 'Conindex' command was used to estimate ECI [42]. The decomposition of the ECI identified contributors to socioeconomic inequality in a comprehensive knowledge about HIV/AIDS [43] using the generalised linear model (GLM) with a binomial distribution and a logit link function. GLM is an approach commonly used to decompose health variables with binary outcomes, serving as a nonlinear regression model [44]. Other studies have also utilized data sets from demographic health surveys [20, 45].

### Ethical considerations

Ethical approval was obtained from Demographic Health Survey (<https://dhsprogram.com/>) (S1 File). The University of Queensland Institutional Ethical Review Board also exempted the ethical issue of this research (approval project number: 2022/HE001760). Other ethical issues, like consent and confidentiality, such as informed consent from parents for data obtained



from children, were managed by the EDHS data collection team during the data collection period. The EDHS data does not allow for the potential identification of any household or individual in the data file. In EDHS surveys, strict rules were imposed at various steps during survey implementation to prevent the direct or indirect disclosure individual respondents' identities, their households, or clusters. Cluster identification codes are scrambled to prevent potential disclosure. All information identifying a cluster, household, or individual was omitted from the data file. The sampling variables in the data file were sufficient to describe the data structure and allow users to uniquely identify the clusters and households for data analysis. Therefore, the authors did not have access to individual identifiers' information.

## Results

### Characteristics, HIV/AIDS awareness and comprehensive knowledge about HIV/AIDS

Originally, adolescents and adults aged from 15 to 49 years old were 19541 in 2005, 29383 in 2011, and 27261 in 2016. However, after managing incomplete data in some variables, the final sample size became 18,818 for 2005, 29,264 for 2011 and no incomplete response in 2016 (no change in sample size). A weighted percentage of 91.7% of adults had ever heard of HIV/AIDS in 2005 which increased to 97.5% in 2011 and 95.0% in 2016. Proportion of adults aged 15 to 49 years having comprehensive knowledge about HIV/AIDS was 19.8% (95% CI: 18.6%-21.0%) in 2005, 25.9% (95% CI: 24.5%-27.4%) in 2011 and 27.9% (95% CI: 26.5%-29.3%) in 2016 (Table 1).

The frequency distribution of study participants corresponding to the percentage of comprehensive knowledge about HIV/AIDS is presented in Table 2. For example, in 2005, men participants accounted for 28.9%, while in 2011, they accounted for 43.7%, and in 2016, they accounted for 42.5%. The majority of participants in 2005 (82.7%), 2011 (76.7%), and 2016 (78.8%) were rural residents. In terms of employment, approximately 50.6% in 2005, 74.0% in 2011, and 68% in 2016 were employed. Additionally, 5.8% in 2005, 39.8% in 2011, and 44.8% in 2016 were responded that they had ever been tested for HIV (Table 2).

### Wealth-related inequality in comprehensive knowledge about HIV/AIDS

**Concentration curve.** The concentration curve shows higher comprehensive knowledge about HIV/AIDS are concentrated among the richest in 2005, 2011, and 2016 (Fig 2).

**Table 1. HIV/AIDS awareness, knowledge-specific questions, proportion of adults aged 15 to 49 years comprehensive knowledge about HIV/AIDS from 2005 to 2016; percentage distribution is weighted.**

| HIV/AIDS awareness and comprehensive knowledge about HIV/AIDS                            | 2005 (n = 18,818)              | 2011 (n = 29,264)           | 2016 (n = 27,261)             |
|------------------------------------------------------------------------------------------|--------------------------------|-----------------------------|-------------------------------|
| Ever heard of AIDS (Yes)                                                                 | 92.0%                          | 97.5%                       | 95.0%                         |
| Knowledge-specific questions (For those who answered yes for ever heard of AIDS)         | n = 17,075                     | n = 28,478                  | n = 25,542                    |
| 1.Reduce risk of getting HIV by always using condoms during sex (Yes)                    | 51.4%                          | 68.9%                       | 69.4%                         |
| 2. Reduce risk of getting HIV by having only one sex partner with no other partner (Yes) | 73.3%                          | 70.5%                       | 77.9%                         |
| 3. Can a healthy-looking person have HIV (Yes)                                           | 61.2%                          | 71.7%                       | 70.6%                         |
| 4. Can get HIV from mosquito bites (No)                                                  | 54.4%                          | 58.4%                       | 72.1%                         |
| 5. Can get HIV by sharing food with person who has AIDS (No)                             | 74.6%                          | 81.5%                       | 87.0%                         |
| Comprehensive knowledge about HIV/AIDS (answer yes for 1, 2, 3, and no for 4 and 5)      | 19.8% (95% CI: 18.6% to 21.0%) | 25.9% (95% CI: 24.5%–27.4%) | 27.9% (95% CI: 26.5 to 29.3%) |

<https://doi.org/10.1371/journal.pgph.0002484.t001>

**Table 2. Study participants' characteristics, comprehensive knowledge about HIV/AIDS between sociodemographic groups among adults aged 15 to 49 years using the 2005, 2011 and 2016 Ethiopian demographic.**

| Variables                                            | 2005 (n = 18,818)      |                             | 2011 (n = 29,264)      |                             | 2016 (n = 27,261)      |                             |
|------------------------------------------------------|------------------------|-----------------------------|------------------------|-----------------------------|------------------------|-----------------------------|
|                                                      | Study participants (%) | Comprehensive knowledge (%) | Study participants (%) | Comprehensive knowledge (%) | Study participants (%) | Comprehensive knowledge (%) |
| Overall                                              |                        | 19.8                        |                        | 25.9                        |                        | 27.9                        |
| <b>Age</b>                                           |                        |                             |                        |                             |                        |                             |
| 15–19                                                | 4,378 (23.26)          | 24.3                        | 6,992 (23.89)          | 28.7                        | 5,947 (21.81)          | 29.9                        |
| 20–24                                                | 3,491 (18.55)          | 24.1                        | 5,239 (17.90)          | 31.3                        | 4,640 (17.02)          | 31.3                        |
| 25–29                                                | 3,125 (16.60)          | 17.0                        | 5,436 (18.58)          | 27.7                        | 4,929 (18.08)          | 28.2                        |
| 30–34                                                | 2,494 (13.26)          | 15.3                        | 3,529 (12.06)          | 23.5                        | 3,976 (14.58)          | 26.5                        |
| 35–39                                                | 2,168 (11.52)          | 16.7                        | 3,544 (12.11)          | 20.9                        | 3,314 (12.16)          | 25.9                        |
| 40–44                                                | 1,629 (8.66)           | 18.1                        | 2,373 (8.11)           | 20.8                        | 2,493 (9.15)           | 23.2                        |
| 45–49                                                | 1,533 (8.15)           | 15.5                        | 2,150 (7.35)           | 17.6                        | 1,962 (7.20)           | 24.8                        |
| <b>Sex</b>                                           |                        |                             |                        |                             |                        |                             |
| Men                                                  | 5,431 (28.86)          | 30.0                        | 12,796 (43.72)         | 34.0                        | 11,594 (42.53)         | 38.3                        |
| Women                                                | 13,387 (71.14)         | 15.8                        | 16,468 (56.28)         | 19.7                        | 15,667 (57.47)         | 20.2                        |
| <b>Residence</b>                                     |                        |                             |                        |                             |                        |                             |
| Urban                                                | 3,256 (17.30)          | 46.0                        | 6,818 (23.30)          | 41.6                        | 5,774 (21.18)          | 43.08                       |
| Rural                                                | 15,562 (82.70)         | 14.3                        | 22,446 (76.70)         | 21.2                        | 21,487 (78.82)         | 23.79                       |
| <b>Region</b>                                        |                        |                             |                        |                             |                        |                             |
| Tigray                                               | 1,191 (6.33)           | 19.1                        | 1,874 (6.40)           | 29.5                        | 1,836 (6.73)           | 32.0                        |
| Afar                                                 | 196 (1.04)             | 15.1                        | 246 (0.84)             | 14.2                        | 210 (0.77)             | 20.1                        |
| Amhara                                               | 4,684 (24.89)          | 22.5                        | 7,888 (26.95)          | 22.8                        | 6,622 (24.29)          | 31.7                        |
| Oromia                                               | 6,797 (36.12)          | 17.3                        | 10,920 (37.32)         | 24.9                        | 10,099 (37.05)         | 25.1                        |
| Somali                                               | 584 (3.10)             | 5.1                         | 572 (1.96)             | 7.1                         | 759 (2.79)             | 6.9                         |
| Benshangul-Gumuz                                     | 166 (0.88)             | 17.2                        | 312 (1.07)             | 26.2                        | 278 (1.02)             | 21.2                        |
| SNNPR                                                | 3,984 (21.17)          | 15.5                        | 5,534 (18.91)          | 29.9                        | 5,653 (20.74)          | 25.2                        |
| Gambela                                              | 59 (0.32)              | 12.7                        | 128 (0.44)             | 26.6                        | 78 (0.29)              | 31.2                        |
| Harari                                               | 52 (0.28)              | 35.2                        | 89 (0.30)              | 25.8                        | 67 (0.25)              | 26.4                        |
| Addis Ababa                                          | 1,009 (5.36)           | 30.9                        | 1,579 (5.40)           | 34                          | 1,502 (5.51)           | 31.3                        |
| Dire Dawa                                            | 96 (0.51)              | 50.9                        | 122 (0.42)             | 38.6                        | 157 (0.57)             | 46.9                        |
| <b>Education status</b>                              |                        |                             |                        |                             |                        |                             |
| No education                                         | 10,979 (58.34)         | 9.3                         | 12,154 (41.53)         | 11.3                        | 10,690 (39.21)         | 15.2                        |
| Primary                                              | 5,065 (26.92)          | 23.9                        | 13,047 (44.59)         | 30.7                        | 11,087 (40.67)         | 29.8                        |
| Secondary education                                  | 2,448 (13.01)          | 53.3                        | 2,399 (8.20)           | 50.4                        | 3,599 (13.20)          | 43.7                        |
| Higher education                                     | 326 (1.73)             | 62.5                        | 1,664 (5.68)           | 59.7                        | 1,885 (6.92)           | 58.1                        |
| <b>Marital status</b>                                |                        |                             |                        |                             |                        |                             |
| Never married                                        | 5,716 (30.38)          | 29.3                        | 10,033 (34.28)         | 34.7                        | 8,909 (32.68)          | 35.6                        |
| Married/living with partner                          | 11,495 (61.09)         | 15.3                        | 17,110 (58.47)         | 21.8                        | 16,648 (61.07)         | 24.1                        |
| Widowed/divorced/no longer living together/separated | 1,607 (8.54)           | 17.7                        | 2121 (7.25)            | 18.1                        | 1,704 (6.25)           | 24.1                        |
| <b>Religion</b>                                      |                        |                             |                        |                             |                        |                             |
| Orthodox                                             | 9,297 (49.40)          | 25.1                        | 13,949 (47.66)         | 28.7                        | 11,934 (43.78)         | 33.2                        |
| Catholic                                             | 215 (1.14)             | 18.9                        | 298 (1.02)             | 29.4                        | 197 (0.72)             | 21.3                        |
| Protestant                                           | 3,504 (18.62)          | 17.1                        | 6,088 (20.80)          | 28.5                        | 6,228 (22.85)          | 25.8                        |
| Muslim                                               | 5,346 (28.41)          | 13.1                        | 8,361 (28.57)          | 19.7                        | 8,534 (31.30)          | 22.7                        |
| Traditional and non-specified                        | 456 (2.42)             | 12.0                        | 568 (1.94)             | 22.0                        | 368 (1.35)             | 15.2                        |
| <b>Employment status</b>                             |                        |                             |                        |                             |                        |                             |
| Not employed                                         | 9,299 (49.41)          | 16.8                        | 7,619 (26.03)          | 20.1                        | 8,737 (32.05)          | 19.0                        |

(Continued)

Table 2. (Continued)

| Variables                                                | 2005 (n = 18,818)      |                             | 2011 (n = 29,264)      |                             | 2016 (n = 27,261)      |                             |
|----------------------------------------------------------|------------------------|-----------------------------|------------------------|-----------------------------|------------------------|-----------------------------|
|                                                          | Study participants (%) | Comprehensive knowledge (%) | Study participants (%) | Comprehensive knowledge (%) | Study participants (%) | Comprehensive knowledge (%) |
| Employed                                                 | 9,519 (50.59)          | 22.8                        | 21,645 (73.97)         | 28.0                        | 18,524 (67.95)         | 32.1                        |
| <b>Wealth Index</b>                                      |                        |                             |                        |                             |                        |                             |
| Poorest                                                  | 3,239 (17.21)          | 9.5                         | 5,106 (17.45)          | 14.2                        | 4,468 (16.39)          | 17.7                        |
| Poorer                                                   | 3,548 (18.85)          | 12.5                        | 5,393 (18.43)          | 17.5                        | 4,9223 (18.06)         | 22.1                        |
| Middle                                                   | 3,566 (18.95)          | 13.6                        | 5,470 (18.69)          | 21.7                        | 5,219 (19.15)          | 23.6                        |
| Richer                                                   | 3,637 (19.33)          | 16.1                        | 5,877 (20.08)          | 27.1                        | 5,560 (20.40)          | 26.8                        |
| Richest                                                  | 4,828 (25.65)          | 39.4                        | 7,418 (25.35)          | 42.4                        | 7,091 (26.01)          | 42.3                        |
| <b>Reading newspaper</b>                                 |                        |                             |                        |                             |                        |                             |
| No                                                       | 14,977 (79.59)         | 13.3                        | 21,224 (72.52)         | 18.7                        | 21,909 (80.37)         | 23.7                        |
| Yes                                                      | 3,841 (20.41)          | 45.3                        | 8,040 (27.48)          | 45.1                        | 5,352 (19.63)          | 45.1                        |
| <b>Listening to radio</b>                                |                        |                             |                        |                             |                        |                             |
| No                                                       | 9,621 (51.13)          | 10.5                        | 10,506 (35.90)         | 15.1                        | 16,065 (58.93)         | 22.1                        |
| Yes                                                      | 9,197 (48.87)          | 29.5                        | 18,758 (64.10)         | 32.0                        | 11,196 (41.07)         | 36.1                        |
| <b>Watching television</b>                               |                        |                             |                        |                             |                        |                             |
| No                                                       | 14,458 (76.83)         | 13.3                        | 14,227 (48.62)         | 16.4                        | 17,262 (63.32)         | 19.7                        |
| Yes                                                      | 4,360 (23.17)          | 41.5                        | 15,037 (51.38)         | 35.0                        | 9,999 (36.68)          | 42.0                        |
| <b>Sex of household head</b>                             |                        |                             |                        |                             |                        |                             |
| Male                                                     | 15,261 (81.10)         | 18.7                        | 23,595 (80.63)         | 25.6                        | 22,009 (80.74)         | 27.2                        |
| Female                                                   | 3,557 (18.90)          | 24.5                        | 5,669 (19.37)          | 27.4                        | 5,252 (19.26)          | 19.3                        |
| <b>Ever been tested for HIV</b><br>(n = 10,858 for 2005) |                        |                             |                        |                             |                        |                             |
| No                                                       | 10,226 (94.18)         | 21.6                        | 17,614 (60.19)         | 19.1                        | 15,058 (55.24)         | 22.1                        |
| Yes                                                      | 632 (5.82)             | 48.0                        | 11,650 (39.81)         | 36.3                        | 12,202 (44.76)         | 35.0                        |

<https://doi.org/10.1371/journal.pgph.0002484.t002>

**Concentration index.** The magnitude of ECI was positive in each year ( $p < 0.001$ ), with values of 0.251, 0.239 and 0.201 in 2005, 2011 and 2016, respectively. These findings indicate that individuals with higher socioeconomic status possess higher comprehensive knowledge about HIV/AIDS than people with low socioeconomic status. This inequality is declined over time with 0.005% per year ( $r = -0.94$ ; slope =  $-0.005$ ) (Fig 3).

### Decomposition of concentration index

Decomposition analysis provided the marginal effect, elasticity, ECI and contribution of covariates to the socioeconomic inequality in comprehensive knowledge about HIV/AIDS from 2005 to 2016.

The probability of men having better comprehensive knowledge about HIV/AIDS than women increased from 2005 to 2016. Regarding geographical region, adults living in Somali region (12.3 percentage point in 2005, 11.4 percentage points in 2011 and 23.4 percentage points in 2016) were lower than in Addis Ababa. Adults in the Amhara region were more likely to have comprehensive knowledge in 2005 (5.5 percentage points higher), in 2011 (7.8 percentage points higher) and in 2016 (3.8 percentage points higher) than in Addis Ababa. Education influences comprehensive knowledge about HIV/AIDS in adults in 2005, 2011, and 2016. People attending primary (9.9 percentage points), secondary (15.8 percentage points), and higher (21.9 percentage points) education were more likely to have comprehensive knowledge about HIV/AIDS than non-educated people in 2016. The richest people were more likely to have comprehensive knowledge about HIV/AIDS by 4.9 percentage points in 2005, 8.2 percentage



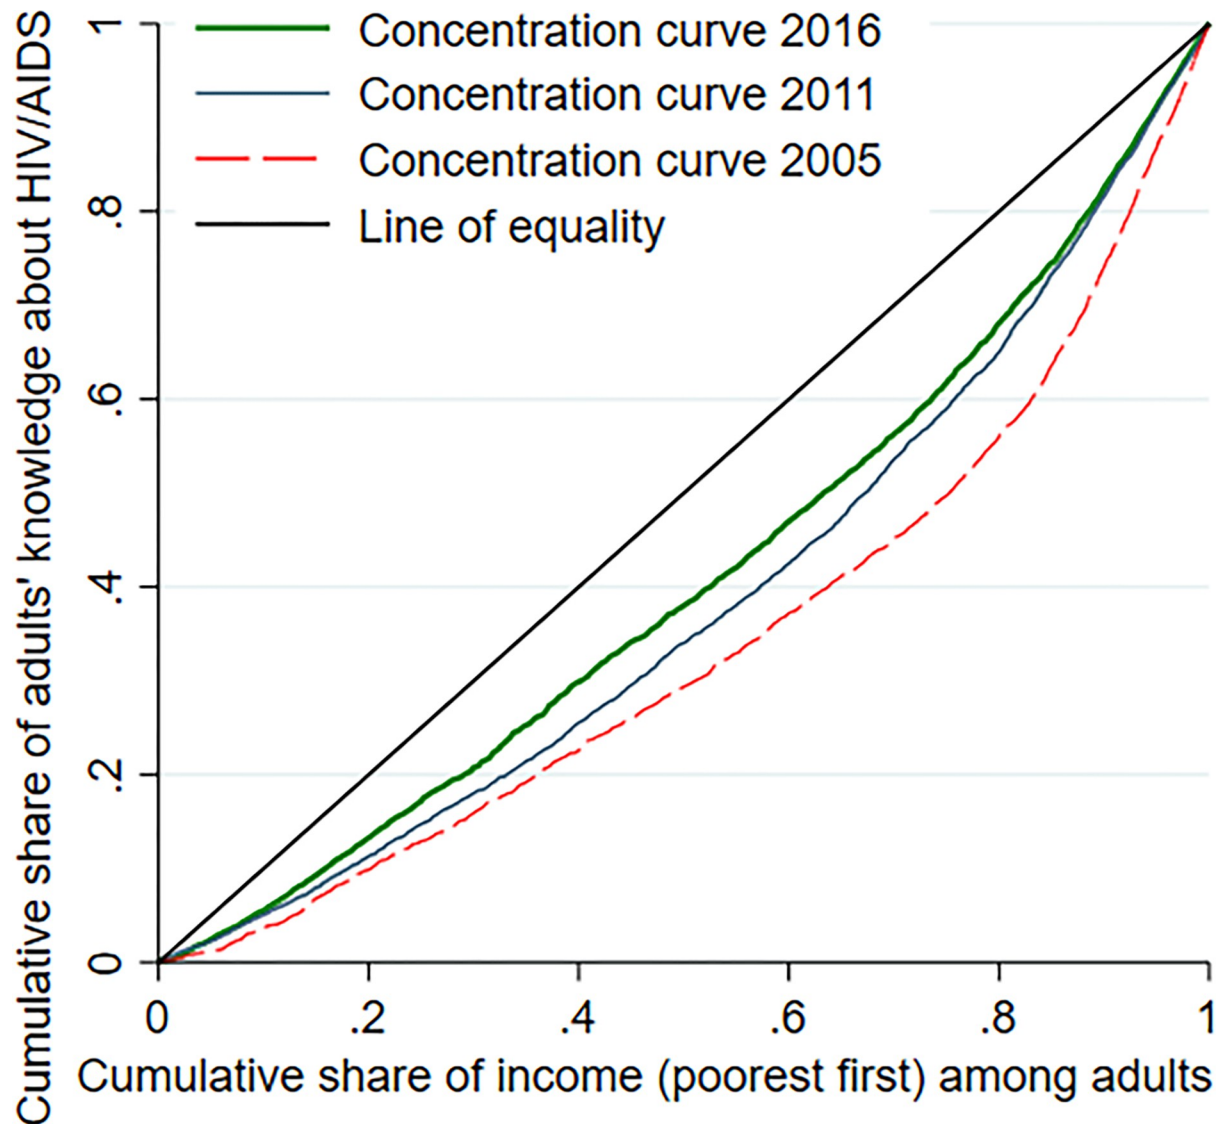

**Fig 2.** The CC plots the cumulative percentage of the comprehensive knowledge about HIV/AIDS on the y-axis against the cumulative percentage of the population ranked by living standards (wealth index), beginning with the poorest and ending with the richest on the x-axis.

<https://doi.org/10.1371/journal.pgph.0002484.g002>

points in 2011 and 5.5 percentage points in 2016. Mass-media exposure, specifically reading newspapers and watching television, and having ever been tested for HIV, consistently demonstrate a strong positive effect on comprehensive knowledge about HIV/AIDS. On the other hand, Marital status (never married), religion, region (Amhara and Somali), employment status, and sex of household were the emerged determinants, while the disparities between age, residence, region (Tigray, Oromia, SNNPR), marital status (widowed/separated), religion (Muslim), income (middle, richer), and listening to the radio could not be persisted determinants (Table 3).

The elasticity value for each variable shows a percentage change that a study participant can experience if a participant is part of a reference group. Determinants with a positive elasticity were positively associated with the socioeconomic inequalities in comprehensive knowledge about HIV/AIDS. For instance, the value of elasticity for primary education was 0.159,

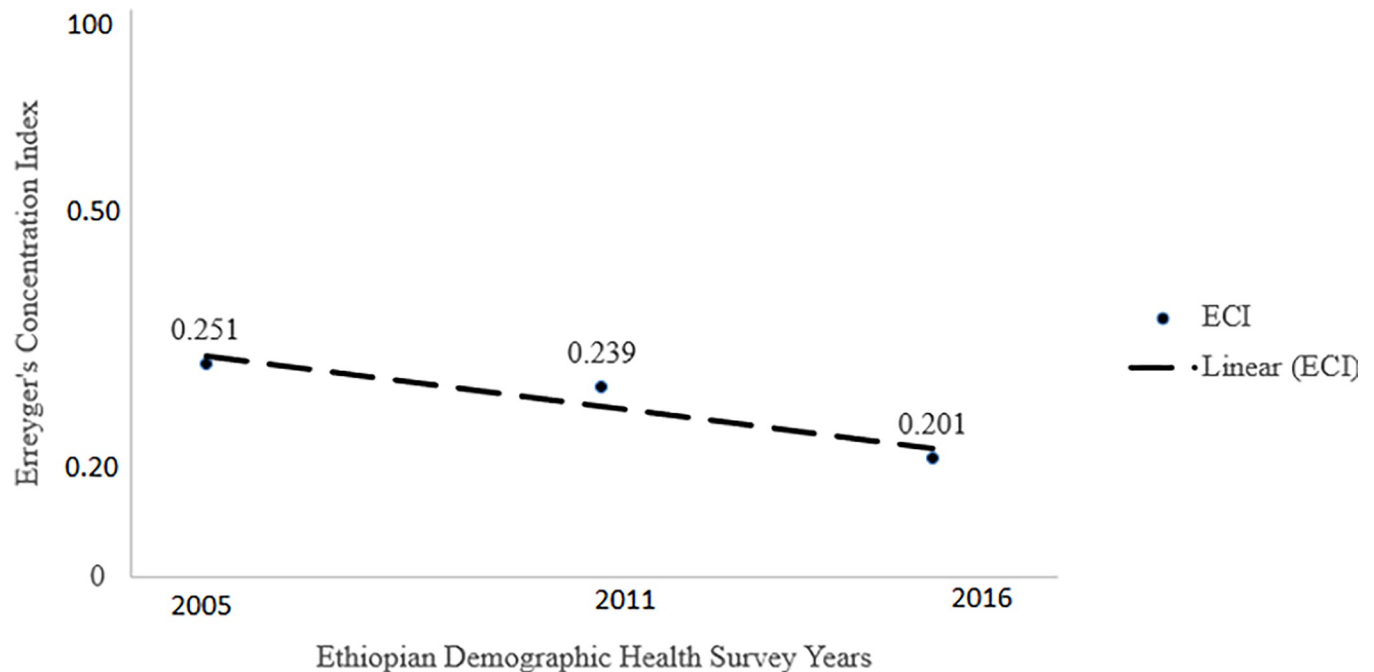

**Fig 3. Trend of socioeconomic inequality in comprehensive knowledge about HIV/AIDS among adults aged 15 to 49 years between 2005 and 2016 in Ethiopia.**

<https://doi.org/10.1371/journal.pgph.0002484.g003>

indicating that a change in education status from non-educated to primary education status would result in a 15.9% increment in pro-rich socioeconomic inequality of comprehensive knowledge about HIV. Determinants with a negative elasticity value represents a shift from the reference group to the counterpart, resulting in a reduced pro-rich socioeconomic inequality in comprehensive knowledge about HIV/AIDS.

The ECI of comprehensive knowledge about HIV/AIDS for each covariate indicates the distribution of each specific variable across socioeconomic status. Variables with positive ECI contributed comprehensive knowledge about HIV/AIDS inequality in favouring the rich while those had negative ECI contributed inequality in favouring the poor in comprehensive knowledge about HIV/AIDS. For example, secondary education (0.214), higher education (0.197), never married (0.180), ever been tested for HIV (0.339), employed (0.056), reading newspapers (0.286), watching television (0.507), women household head (0.085) had positive ECI while man (-0.003) and primary education (-0.005) had negative ECI among adults. Major contributors to the socioeconomic inequality in comprehensive knowledge about HIV/AIDS were watching television, household wealth rank, education status, listening to the radio, residence, reading newspaper and geographic region. The percentage contribution of watching television increased from 4.3% in 2005 to 24.2% among both sexes in 2016. Wealth quantile contribution increased from 14.6% in 2005 to 21.38% in 2016. Education status contribution decreased from 16.2% to 14.3%. The percentage contribution of listening to the radio decreased from 16.9% in 2005 to -2.4% in 2016. The percentage contribution of residence decreased from 7.8% in 2005 to -0.5% in 2016 (Table 4 and Fig 4).

## Discussion

Significant socioeconomic inequality was observed in comprehensive knowledge about HIV/AIDS, which gradually declined between 2005 and 2016. Household wealth rank, education

**Table 3. The marginal effects ( $\beta$ ) with 95% CI for determinants of comprehensive knowledge about HIV/AIDS among adults aged 15 to 49 years from 2005 to 2016 in Ethiopia.**

| Variables                                                      | 2005 $\beta$ (95% CI)      | 2011 $\beta$ (95% CI)      | 2016 $\beta$ (95% CI)      |
|----------------------------------------------------------------|----------------------------|----------------------------|----------------------------|
| <b>Age (reference: 15–19 years)</b>                            |                            |                            |                            |
| 20–24                                                          | 0.007 (-0.008, 0.023)      | 0.005 (-0.010, 0.020)      | -0.001 (-0.018, 0.016)     |
| 25–29                                                          | -0.022 (-0.042, -0.003)*   | 0.020 (0.003, 0.038)*      | -0.013 (-0.033, 0.006)     |
| 30–34                                                          | -0.035 (-0.057, -0.013)**  | -0.004 (-0.025, 0.016)     | 0.008 (-0.013, 0.030)      |
| 35–39                                                          | -0.010 (-0.033, 0.013)     | -0.023 (-0.044, -0.002)*   | 0.017 (-0.006, 0.039)      |
| 40–44                                                          | 0.011 (-0.014, 0.036)*     | -0.013 (-0.036, 0.011)     | -0.023 (-0.048, 0.002)     |
| 45–49                                                          | 0.005 (-0.021, 0.031)      | -0.023 (-0.049, 0.002)     | 0.006 (-0.021, 0.032)      |
| <b>Sex (reference: women)</b>                                  |                            |                            |                            |
| Man                                                            | 0.074 (0.061, 0.086)***    | 0.079 (0.068, 0.089)***    | 0.117 (0.106, 0.129)***    |
| <b>Residence (Reference: Rural)</b>                            |                            |                            |                            |
| Urban                                                          | 0.052 (0.033, 0.071)***    | 0.026 (0.007, 0.044)**     | -0.002 (-0.022, 0.018)     |
| <b>Region (Reference: Addis Ababa)</b>                         |                            |                            |                            |
| Tigray                                                         | -0.037 (-0.066, -0.009)*   | 0.082 (0.056, 0.108)***    | 0.015 (-0.013, 0.043)      |
| Afar                                                           | -0.005 (-0.065, 0.054)     | -0.007 (-0.074, 0.059)     | -0.049 (-0.116, 0.019)     |
| Amhara                                                         | 0.055 (0.031, 0.078)***    | 0.078 (0.057, 0.100)***    | 0.038 (0.014, 0.061)**     |
| Oromia                                                         | -0.031 (-0.053, -0.010)**  | 0.071 (0.050, 0.092)***    | -0.007 (-0.031, 0.016)     |
| Somali                                                         | -0.123 (-0.174, -0.072)*** | -0.114 (-0.172, -0.057)*** | -0.234 (-0.290, -0.178)*** |
| Benishangul-Gumuz                                              | 0.009 (-0.050, 0.068)      | 0.110 (0.061, 0.159)***    | -0.059 (-0.117, -0.002)*   |
| SNNPR                                                          | -0.024 (-0.049, 0.001)     | 0.116 (0.093, 0.139)***    | 0.005 (-0.021, 0.032)      |
| Gambela                                                        | -0.081 (-0.186, 0.024)     | 0.026 (-0.046, 0.100)      | -0.026 (-0.118, 0.066)     |
| Harari                                                         | -0.025 (-0.108, 0.058)     | -0.031 (-0.116, 0.054)     | -0.078 (-0.181, 0.024)     |
| Dire Dawa                                                      | -0.043 (-0.107, 0.022)     | 0.049 (-0.020, 0.118)      | -0.048 (-0.114, 0.018)     |
| <b>Education (Reference: no education)</b>                     |                            |                            |                            |
| Primary                                                        | 0.098 (0.083, 0.112)***    | 0.116 (0.103, 0.128)***    | 0.099 (0.085, 0.113)***    |
| Secondary                                                      | 0.187 (0.166, 0.203)***    | 0.180 (0.160, 0.199)***    | 0.158 (0.140, 0.177)***    |
| Higher                                                         | 0.186 (0.152, 0.221)***    | 0.212 (0.189, 0.235)***    | 0.219 (0.196, 0.242)***    |
| <b>Marital status (Reference: Married/living with partner)</b> |                            |                            |                            |
| Never married                                                  | 0.008 (-0.024, 0.008)      | 0.010 (-0.005, 0.024)      | 0.023 (0.007, 0.039)*      |
| Widowed/divorced/no longer living together/separated           | -0.004 (-0.026, 0.017)     | -0.024 (-0.046, -0.003)*   | -0.001 (-0.023, 0.022)     |
| <b>Religion (Reference: Orthodox)</b>                          |                            |                            |                            |
| Catholic                                                       | 0.001 (-0.048, 0.050)      | -0.006 (-0.051, 0.040)     | -0.071 (-0.134, -0.007)*   |
| Protestant                                                     | -0.012 (-0.029, 0.005)     | -0.008 (-0.022, 0.007)     | -0.028 (-0.045, -0.012)*** |
| Muslim                                                         | -0.025 (-0.039, -0.010)**  | -0.041 (-0.053, -0.028)*** | -0.007 (-0.021, 0.007)     |
| Traditional and non-specific                                   | -0.021 (-0.062, 0.019)     | -0.020 (-0.057, 0.017)     | -0.06 (-0.116, -0.008)*    |
| <b>Employment status (Reference: not employed)</b>             |                            |                            |                            |
| Employed                                                       | 0.010 (-0.001, 0.022)      | 0.020 (0.007, 0.032)**     | 0.034 (0.021, 0.047)***    |
| <b>Wealth status (Reference: Poorest)</b>                      |                            |                            |                            |
| Poorer                                                         | 0.008 (-0.012, 0.029)      | 0.012 (-0.006, 0.030)      | 0.009 (-0.010, 0.028)      |
| Middle                                                         | 0.001 (-0.020, 0.022)      | 0.041 (0.024, 0.059)***    | 0.007 (-0.012, 0.026)      |
| Richer                                                         | 0.002 (-0.018, 0.023)      | 0.052 (0.035, 0.069)***    | 0.012 (-0.006, 0.031)      |
| Richest                                                        | 0.049 (0.027, 0.072)***    | 0.082 (0.060, 0.104)***    | 0.055 (0.032, 0.077)***    |
| <b>Reading Newspapers (Reference: No)</b>                      |                            |                            |                            |
| Yes                                                            | 0.030 (0.016, 0.044)***    | 0.050 (0.038, 0.061)***    | 0.023 (0.010, 0.037)***    |
| <b>Listening to the radio (Reference: No)</b>                  |                            |                            |                            |
| Yes                                                            | 0.045 (0.032, 0.057)***    | 0.052 (0.041, 0.064)***    | -0.008 (-0.020, 0.004)     |
| <b>Watching television (Reference: No)</b>                     |                            |                            |                            |

(Continued)

Table 3. (Continued)

|                                                 |                         |                         |                         |
|-------------------------------------------------|-------------------------|-------------------------|-------------------------|
| Yes                                             | 0.025 (0.010, 0.039)*** | 0.029 (0.018, 0.040)*** | 0.065 (0.052, 0.078)*** |
| <b>Sex of household head (Reference: Male)</b>  |                         |                         |                         |
| Female                                          | 0.009 (-0.005, 0.023)   | 0.0002 (-0.012, 0.013)  | 0.019 (0.005, 0.032)**  |
| <b>Ever been tested for HIV (Reference: No)</b> |                         |                         |                         |
| Yes                                             | –                       | 0.067 (0.058, 0.077)*** | 0.051 (0.039, 0.062)*** |

\*  $p < 0.05$ .\*\*  $p < 0.01$ .\*\*\*  $p < 0.001$ <https://doi.org/10.1371/journal.pgph.0002484.t003>

status, reading newspapers, watching television, and HIV testing were the largest contributors to socioeconomic inequality in comprehensive knowledge about HIV/AIDS. The urban and rural disparity in wealth-related inequality in comprehensive knowledge about HIV/AIDS declined in 2016. Regarding determinants, sex, regions (Amhara and Somali), education status, richest, mass media (reading newspapers and watching television), and ever being tested for HIV were persistent associated factors.

The current result on the existing socioeconomic disparities is consistent with previous finding in Malawi and Nigeria [20, 46]: people in lower socioeconomic households had lower comprehensive knowledge about HIV/AIDS. This might be due to individuals with lower-income level have limited access to HIV/AIDS prevention information and other services [47]. The lack of information may lead people of low socioeconomic status to make suboptimal decisions regarding health care [48]. Individuals in the poorest household wealth rank may not seek regular health care, resulting in lower levels of knowledge [49]. Other studies among reproductive age women in Ethiopia and sub-Saharan Africa revealed similar findings [17, 28]. In these previous studies, it was found that women living in the poorest household had lower comprehensive knowledge about HIV/AIDS. However, in the current study, over time, despite the significant gap, there has been a decrease in the disparity between the poorest and richest groups decreased as comprehensive knowledge about HIV/AIDS increased among the low-wealth rank group. On the other hand, there has been relatively consistent comprehensive knowledge about HIV/AIDS observed in the highest wealth rank group.

Education status consistently and persistently contributed to socioeconomic inequality in comprehensive knowledge about HIV/AIDS. This result can be explained by individuals in the poorest household wealth rank and those uneducated had lower comprehensive knowledge about HIV/AIDS. A previous study by Chirwa [20] reported similar findings, where individuals with secondary education and above have significantly contributed to socioeconomic inequality compared to their non-educated counterparts. It is understood that higher education status enabled adults' health-seeking behaviors [50]. This leads higher educated individuals to seek connections with health institutions, where they can access health education and counselling services. People who attended health care have higher chance of getting health promotion services. This can be explained by the fact that individuals tested for HIV have shown higher comprehensive knowledge about HIV/AIDS over time, as evidenced by the current study and another comparable study [51].

Mass media exposure was also contributed to the difference in comprehensive knowledge about HIV/AIDS between the richest and poorest economic statuses. Specifically, reading newspaper and watching television resulted in differences in knowledge about HIV/AIDS between poorest and richest economic statuses. Another previous study similarly revealed that reading newspapers significantly contributed to socioeconomic inequality in knowledge about

Table 4. The elasticity, ECI, and contribution of covariates to the socioeconomic inequality in comprehensive knowledge among adults aged 15 to 49 years in Ethiopia.

| Variables                                                          | 2005       |                     |                                         | 2011       |                     |                                         | 2016       |                     |                                        |
|--------------------------------------------------------------------|------------|---------------------|-----------------------------------------|------------|---------------------|-----------------------------------------|------------|---------------------|----------------------------------------|
|                                                                    | Elasticity | Concentration Index | Percentage contribution<br>Total 65.36% | Elasticity | Concentration Index | Percentage contribution<br>Total 87.82% | Elasticity | Concentration Index | Percentage contribution<br>Total 81.9% |
| <b>Age (Reference: 15–19 years)</b>                                |            |                     |                                         |            |                     |                                         |            |                     |                                        |
| 20–24                                                              | 0.006      | 0.031               | 0.068                                   | 0.003      | 0.050               | 0.071                                   | -0.001     | 0.010               | -0.004                                 |
| 25–29                                                              | -0.015     | -0.0004             | 0.003                                   | 0.0150     | 0.011               | 0.066                                   | -0.010     | 0.011               | -0.053                                 |
| 30–34                                                              | -0.019     | -0.035              | 0.263                                   | -0.002     | 0.004               | -0.003                                  | 0.005      | -0.011              | -0.025                                 |
| 35–39                                                              | -0.005     | -0.027              | 0.051                                   | -0.011     | -0.018              | 0.080                                   | 0.008      | -0.015              | -0.062                                 |
| 40–44                                                              | 0.004      | -0.019              | -0.028                                  | -0.004     | -0.019              | 0.031                                   | -0.008     | -0.013              | 0.055                                  |
| 45–49                                                              | 0.002      | -0.010              | -0.007                                  | -0.007     | -0.036              | 0.099                                   | 0.002      | -0.013              | -0.011                                 |
| Summed                                                             |            |                     | 0.35                                    |            |                     | 0.344                                   |            |                     | -0.01                                  |
| <b>Sex (Reference: Women)</b>                                      |            |                     |                                         |            |                     |                                         |            |                     |                                        |
| Men                                                                | 0.085      | -0.019              | -0.645                                  | 0.145      | 0.003               | 0.175                                   | 0.210      | -0.003              | -0.316                                 |
| <b>Residence (Reference: Rural)</b>                                |            |                     |                                         |            |                     |                                         |            |                     |                                        |
| Urban                                                              | 0.036      | 0.547               | 7.82                                    | 0.024      | 0.643               | 6.35                                    | -0.002     | 0.601               | -0.510                                 |
| <b>Region (Reference: Addis Ababa)</b>                             |            |                     |                                         |            |                     |                                         |            |                     |                                        |
| Tigray                                                             | -0.009     | -0.041              | 0.154                                   | 0.021      | -0.010              | -0.091                                  | 0.004      | -0.022              | -0.044                                 |
| Afar                                                               | -0.0002    | -0.018              | 0.002                                   | -0.0002    | -0.008              | 0.001                                   | -0.001     | -0.013              | 0.010                                  |
| Amhara                                                             | 0.054      | -0.045              | -0.975                                  | 0.085      | -0.114              | -4.08                                   | 0.038      | -0.015              | -0.269                                 |
| Oromia                                                             | -0.045     | -0.041              | 0.742                                   | 0.106      | -0.019              | -0.841                                  | -0.011     | -0.029              | 0.157                                  |
| Somali                                                             | -0.015     | -0.069              | 0.415                                   | -0.009     | -0.011              | 0.042                                   | -0.026     | -0.057              | 0.741                                  |
| Benishangul-Gumuz                                                  | 0.0003     | -0.003              | -0.0004                                 | 0.005      | -0.006              | -0.012                                  | -0.002     | -0.007              | 0.008                                  |
| SNNPR                                                              | -0.020     | 0.010               | -0.083                                  | 0.088      | -0.033              | -1.21                                   | 0.005      | -0.065              | -0.147                                 |
| Gambela                                                            | -0.001     | -0.002              | 0.001                                   | 0.0004     | 0.003               | 0.0005                                  | -0.0003    | 0.001               | -0.0002                                |
| Harari                                                             | -0.0003    | 0.006               | -0.001                                  | -0.0004    | 0.007               | -0.001                                  | -0.0008    | 0.004               | -0.002                                 |
| Dire Dawa                                                          | -0.001     | 0.010               | -0.004                                  | 0.001      | 0.009               | 0.003                                   | -0.001     | 0.010               | -0.005                                 |
| Summed                                                             |            |                     | 0.251                                   |            |                     | -6.19                                   |            |                     | 0.45                                   |
| <b>Education (Reference: no education)</b>                         |            |                     |                                         |            |                     |                                         |            |                     |                                        |
| Primary                                                            | 0.102      | 0.098               | 4.11                                    | 0.203      | 0.079               | 6.65                                    | 0.159      | -0.005              | -0.363                                 |
| Secondary                                                          | 0.096      | 0.308               | 11.76                                   | 0.057      | 0.172               | 4.10                                    | 0.0818     | 0.214               | 8.69                                   |
| Higher                                                             | 0.013      | 0.060               | 0.306                                   | 0.048      | 0.166               | 3.29                                    | 0.061      | 0.197               | 5.99                                   |
| Summed                                                             |            |                     | 16.18                                   |            |                     | 14.04                                   |            |                     | 14.32                                  |
| <b>Marital status (Reference: Married/living with partner)</b>     |            |                     |                                         |            |                     |                                         |            |                     |                                        |
| Never married                                                      | -0.010     | 0.195               | -0.742                                  | 0.013      | 0.173               | 0.937                                   | 0.029      | 0.180               | 2.60                                   |
| Widowed/<br>divorced/no<br>longer living<br>together/<br>separated | -0.002     | 0.008               | -0.005                                  | -0.007     | 0.007               | -0.020                                  | -0.0002    | 0.007               | -0.001                                 |
| Summed                                                             |            |                     | -0.747                                  |            |                     | 0.917                                   |            |                     | 2.60                                   |
| <b>Religion (Reference: Orthodox)</b>                              |            |                     |                                         |            |                     |                                         |            |                     |                                        |
| Catholic                                                           | 0.00003    | 0.003               | 0.00003                                 | -0.0002    | 0.001               | -0.0001                                 | -0.002     | 0.002               | -0.002                                 |
| Protestant                                                         | -0.009     | 0.034               | -0.116                                  | -0.006     | -0.017              | 0.045                                   | -0.026     | 0.028               | -0.360                                 |
| Muslim                                                             | -0.028     | -0.242              | 2.70                                    | -0.046     | -0.086              | 1.64                                    | 0.009      | -0.201              | 0.908                                  |
| Traditional and<br>non-specified                                   | -0.002     | -0.029              | 0.024                                   | -0.002     | -0.029              | 0.019                                   | -0.003     | -0.026              | 0.0426                                 |
| Summed                                                             |            |                     | 2.61                                    |            |                     | 1.70                                    |            |                     | 0.59                                   |

(Continued)



Table 4. (Continued)

| Variables                                         | 2005       |                     |                                      | 2011       |                     |                                      | 2016       |                     |                                     |
|---------------------------------------------------|------------|---------------------|--------------------------------------|------------|---------------------|--------------------------------------|------------|---------------------|-------------------------------------|
|                                                   | Elasticity | Concentration Index | Percentage contribution Total 65.36% | Elasticity | Concentration Index | Percentage contribution Total 87.82% | Elasticity | Concentration Index | Percentage contribution Total 81.9% |
| <b>Employment status (Reference: No employed)</b> |            |                     |                                      |            |                     |                                      |            |                     |                                     |
| Employed                                          | 0.021      | 0.002               | 0.014                                | 0.059      | -0.025              | -0.610                               | 0.094      | 0.056               | 2.63                                |
| <b>Wealth status</b>                              |            |                     |                                      |            |                     |                                      |            |                     |                                     |
| Poorest                                           | Reference  | Reference           | Reference                            | Reference  | Reference           | Reference                            | Reference  | Reference           | Reference                           |
| Poorer                                            | 0.006      | -0.352              | -0.881                               | 0.009      | -0.346              | -1.24                                | 0.006      | -0.356              | -1.1                                |
| Middle                                            | 0.001      | -0.068              | -0.021                               | 0.031      | -0.070              | -0.908                               | 0.005      | -0.09               | -0.238                              |
| Richer                                            | 0.002      | 0.227               | 0.150                                | 0.042      | 0.239               | 4.18                                 | 0.010      | 0.227               | 1.13                                |
| Richest                                           | 0.051      | 0.763               | 15.35                                | 0.082      | 0.751               | 25.67                                | 0.057      | 0.768               | 21.59                               |
| Summed                                            |            |                     | 14.60                                |            |                     | 27.70                                |            |                     | 21.38                               |
| <b>Reading Newspapers (Reference: No)</b>         |            |                     |                                      |            |                     |                                      |            |                     |                                     |
| Yes                                               | 0.025      | 0.365               | 3.56                                 | 0.054      | 0.362               | 8.22                                 | 0.018      | 0.286               | 2.61                                |
| <b>Listening to the radio (Reference: No)</b>     |            |                     |                                      |            |                     |                                      |            |                     |                                     |
| Yes                                               | 0.087      | 0.486               | 16.92                                | 0.134      | 0.313               | 17.52                                | -0.013     | 0.374               | -2.35                               |
| <b>Watching television (Reference: No)</b>        |            |                     |                                      |            |                     |                                      |            |                     |                                     |
| Yes                                               | 0.023      | 0.468               | 4.26                                 | 0.060      | 0.412               | 10.37                                | 0.096      | 0.507               | 24.17                               |
| <b>Sex of household head (Reference: Male)</b>    |            |                     |                                      |            |                     |                                      |            |                     |                                     |
| Female                                            | 0.007      | 0.075               | 0.200                                | 0.0001     | 0.086               | 0.004                                | 0.014      | 0.085               | 0.582                               |
| <b>Ever been tested for HIV (Reference: No)</b>   |            |                     |                                      |            |                     |                                      |            |                     |                                     |
| Yes                                               | –          | –                   | –                                    | 0.106      | 0.334               | 14.83                                | 0.091      | 0.339               | 15.26                               |

<https://doi.org/10.1371/journal.pgph.0002484.t004>

HIV/AIDS [52]. Mass-media exposure has contributed to socioeconomic inequality in knowledge about HIV/AIDS, and persistently played a role in creating differences between those who have had mass media exposure and those who do not.

Attending HIV/AIDS-related services can improve an individual's comprehensive knowledge about HIV/AIDS. The current study identified that individuals who had ever been tested for HIV had better knowledge. HIV testing provides opportunities for individuals to ask questions, receive detailed information about HIV/AIDS modes of transmission and prevention mechanisms, and gain knowledge measurement indicators [53]. Another study determined that having ever tested for HIV was positively associated with knowledge about HIV/AIDS [54]. It has bidirectional relationship, as knowledgeable individuals are more likely to undergo HIV testing [55]. Therefore, interventions aimed at fostering knowledge about HIV/AIDS may work to facilitate HIV testing provision and increase coverage.

According to the current study, men demonstrated better comprehensive knowledge over time. It is important to note that knowledge about HIV/AIDS can vary based on factors such as education, employment, income, and access to digital technologies [56, 57]. In Ethiopia, men generally have better education and employment opportunity, higher income status, and greater access to the internet compared to women [58–60]. Consequently, men are more likely to access information about HIV/AIDS. Another previous study in Nigeria supported the findings of the current study, indicating that men possessed a higher level of knowledge regarding HIV/AIDS compared to women [46].

An individual and public health approach are required to achieve equality in knowledge about HIV/AIDS. These can be interconnected with a complex system model [61]. Several actors could be engaged in universal HIV/AIDS knowledge creation. For example, school-based HIV/AIDS education, mass-media, and individual or targeted (small group-based)

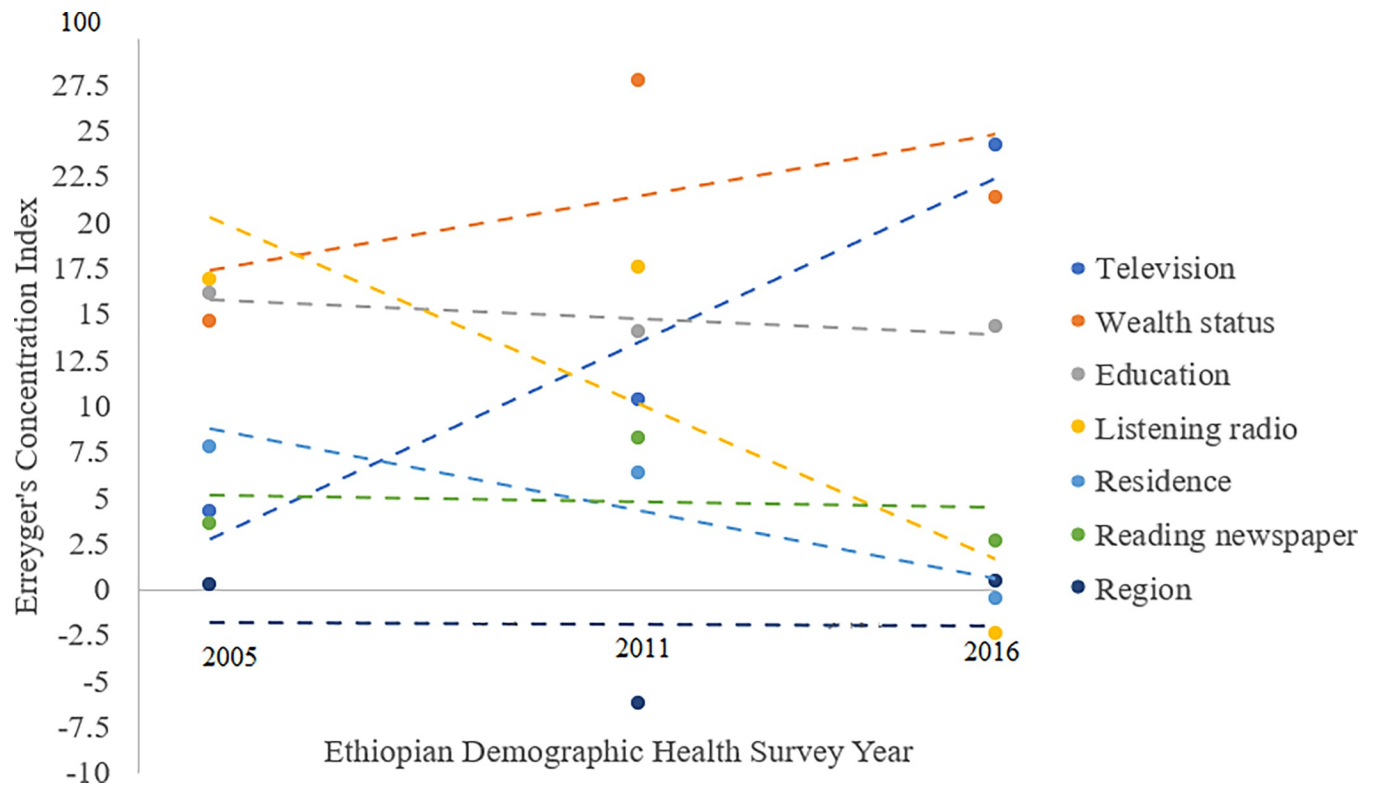

**Fig 4.** Percentage contribution of covariates to socioeconomic inequality in knowledge about HIV/AIDS among adults aged 15 to 49 years in Ethiopia over time.

<https://doi.org/10.1371/journal.pgph.0002484.g004>

public health intervention [62, 63]. Recent public health strategy emphasises minimal behavioural change on targeted groups to progressively result in coverage of largest population [64]. The individual-level approach could be highly effective by targeting clients who attend health institutions for different health care services; those who have ever been tested for HIV were more likely to have comprehensive knowledge in this study and other literature [20]. The individual level approach was tested, effectively reducing disparity in other health care services (e.g., smoking cessation) [65]. Individual-level interventions, such as cognitive, affective, and behavioral-related have been utilized in the behavioural-related health issues [66]. Some may mention individualised interventions as costly [67]. However, HIV/AIDS interventions could be easily integrated with other house-to-house community-based walk-in services in Ethiopia because many health care services are government funded [68]. Health extension workers have been participating in rural areas at household level, where packages of the rural health extension program include HIV/AIDS prevention and control activities [69]. The World Health Organization also prepared a guide for health policy and system support to engage community health workers to fill the HIV-related knowledge gap in the community [70].

This study has limitations. The parameters of comprehensive knowledge about HIV/AIDS may be prone to recall bias because they were based on respondents' self-report [71]. Disparity changes were based on the oldest and recent EDHS period that does not represent a continuum study favoured from longitudinal data. Longitudinal study is based on longitudinal data, which is collated sequentially from the same respondents repeatedly [72]. Additionally, the distribution of the study participants is a weighted value to each variable in which case some may lose their actual value. Furthermore, the findings from the current study does not exactly show

causation, similar to other priori studies [20]. However, this study's strength of this study lies in its ability to genuinely represent the target population, as the non-response rate was insignificant.

## Conclusions

This study shows comprehensive knowledge about HIV/AIDS was concentrated among those with a higher socioeconomic status. Socioeconomic-related inequality in comprehensive knowledge is woven deeply in Ethiopia, though this disparity has been minimally decreased. A combination of individual and public health approaches entangled in a societal system are crucial remedies for the general population and disadvantaged groups. This requires comprehensive interventions according to the primary health care approach.

## Supporting information

**S1 Checklist. The current study reporting checklists.**  
(DOCX)

**S1 File. DHS approval letter: Ethical approval supporting letter.**  
(PDF)

## Author Contributions

**Conceptualization:** Aklilu Endalamaw, Yibeltal Assefa.

**Data curation:** Aklilu Endalamaw.

**Formal analysis:** Aklilu Endalamaw.

**Investigation:** Aklilu Endalamaw.

**Methodology:** Aklilu Endalamaw.

**Project administration:** Aklilu Endalamaw.

**Software:** Aklilu Endalamaw.

**Supervision:** Aklilu Endalamaw, Charles F. Gilks, Fentie Ambaw, Yibeltal Assefa.

**Validation:** Aklilu Endalamaw, Charles F. Gilks, Fentie Ambaw, Yibeltal Assefa.

**Visualization:** Aklilu Endalamaw, Resham B. Khatri, Yibeltal Assefa.

**Writing – original draft:** Aklilu Endalamaw.

**Writing – review & editing:** Aklilu Endalamaw, Charles F. Gilks, Fentie Ambaw, Resham B. Khatri, Yibeltal Assefa.

## References

1. Harris LFF, Toledo L, Dunbar E, Aquino GA, Nesheim SR. Program collaboration and service integration activities among HIV programs in 59 US health departments. *Public Health Reports*. 2014; 129 (1\_suppl1):33–42.
2. World Health Organization. Integration of mental health and HIV interventions: key considerations. Integration of mental health and HIV interventions: key considerations. Geneva: World Health Organization; 2022 [updated 2022; cited 2022 Nov 24]. Available from <https://www.who.int/publications/i/item/9789240043176>.
3. Vassall A, Pickles M, Chandrashekar S, Boily M-C, Shetty G, Guinness L, et al. Cost-effectiveness of HIV prevention for high-risk groups at scale: an economic evaluation of the Avahan programme in south

- India. *The Lancet Global Health*. 2014; 2(9):e531–e40. [https://doi.org/10.1016/S2214-109X\(14\)70277-3](https://doi.org/10.1016/S2214-109X(14)70277-3) PMID: 25304420
4. UNAIDS. *Combination HIV Prevention: Tailoring and Coordinating Biomedical, Behavioural and Structural Strategies to Reduce New HIV Infections*. UNAIDS. Geneva, Switzerland: UNAIDS; 2010.
  5. Federal HIV/AIDS Prevention and Control Office. *HIV/AIDS Strategic Plan 2015–2020 in an Investment Case Approach* Addis Ababa, Ethiopia; 2014. Available from: <http://www.etharc.org/index.php/resources/download/finish/33/757>.
  6. Pattanaphesaj J, Teerawattananon Y. Reviewing the evidence on effectiveness and cost-effectiveness of HIV prevention strategies in Thailand. *BMC Public Health*. 2010; 10:401. <https://doi.org/10.1186/1471-2458-10-401> PMID: 20604975
  7. Weinstock HS, LINDAN C, Bolan G, Kegeles SM, Hearst N. Factors associated with condom use in a high-risk heterosexual population. *Sexually transmitted diseases*. 1993;14–20. <https://doi.org/10.1097/00007435-199301000-00004> PMID: 8430354
  8. Gebeyehu NA, Chanko KP, Yesigat YM. Factors Associated with Condom Use Self-Efficacy Among Preparatory School Students in Sodo Town, Southern Ethiopia 2020: A Cross-Sectional Study. *HIV AIDS (Auckl)*. 2020; 12:363–71. <https://doi.org/10.2147/HIV.S256683> PMID: 32884362
  9. Mbago MC. Socio-demographic correlates of desire for HIV testing in Tanzania. *Sexual health*. 2003; 1(1):13–21.
  10. Endalamaw A, Geremew D, Alemu SM, Ambachew S, Tesera H, Habtewold TD. HIV test coverage among pregnant women in Ethiopia: A systematic review and meta-analysis. *Afr J AIDS Res*. 2021; 20(4):259–69. <https://doi.org/10.2989/16085906.2021.1980066> PMID: 34905450
  11. USAID, UNAIDS, WHO, UNICEF and the Policy Project. *Coverage of Selected Services for HIV/AIDS prevention, care and support in low and middle income countries in 2003* Wachingyon, DC 20036 USA; 2004 [cited 2022 September 07]. Available from: [https://data.unaids.org/pub/report/2004/2004-coverage-survey-2003-report\\_en.pdf](https://data.unaids.org/pub/report/2004/2004-coverage-survey-2003-report_en.pdf).
  12. UNAIDS. *Global AIDS Monitoring Framework 2022–2026: Framework for monitoring the 2021 Political Declaration on AIDS* Geneva, Switzerland; 2021 [cited 2022 September 09]. Available from: [https://www.unaids.org/sites/default/files/media\\_asset/UNAIDS\\_GAM\\_Framework\\_2022\\_EN.pdf](https://www.unaids.org/sites/default/files/media_asset/UNAIDS_GAM_Framework_2022_EN.pdf).
  13. UNAIDS. *Guidance and Specifications for Additional Recommended Indicators*. Addendum to: UNGASS. *Monitoring the Declaration of Commitment on HIV/AIDS. Guidelines on Construction of Core Indicators*. 2008 Reporting. Geneva: Joint United Nations Programme on HIV/AIDS; 2008. Available from: [https://www.unaids.org/sites/default/files/sub\\_landing/files/JC1768-Additional\\_Indicators\\_v2\\_En.pdf](https://www.unaids.org/sites/default/files/sub_landing/files/JC1768-Additional_Indicators_v2_En.pdf).
  14. Wang W, Chen R, Ma Y, Sun X, Qin X, Hu Z. The impact of social organizations on HIV/AIDS prevention knowledge among migrants in Hefei, China. *Globalization and health*. 2018; 14(1):1–9.
  15. Federal HIV/AIDS Prevention and Control Office. *HIV Prevention in Ethiopia National Road Map 2018–2020*. Addis Ababa, Ethiopia; 2018. Available from: <https://ethiopia.unfpa.org/en/publications/hiv-prevention-ethiopia-national-road-map-2018>.
  16. Central Statistical Agency (CSA)[Ethiopia] and ICF. *Ethiopia Demographic and Health Survey*. Addis Ababa, Ethiopia, and Rockville, Maryland, USA: CSA and ICF; 2016. Available from: <https://dhsprogram.com/pubs/pdf/FR328/FR328.pdf>
  17. Teshale AB, Yeshaw Y, Alem AZ, Ayalew HG, Liyew AM, Tessema ZT, et al. Comprehensive knowledge about HIV/AIDS and associated factors among women of reproductive age in sub-Saharan Africa: a multilevel analysis using the most recent demographic and health survey of each country. *BMC Infectious Diseases*. 2022; 22(1):130. <https://doi.org/10.1186/s12879-022-07124-9> PMID: 35130865
  18. Kawuki J, Gatasi G, Sserwanja Q, Mukunya D, Musaba MW. Comprehensive knowledge about HIV/AIDS and associated factors among adolescent girls in Rwanda: a nationwide cross-sectional study. 2022.
  19. Hamidouche M, Ante-Testard PA, Baggaley R, Temime L, Jean K. Monitoring socioeconomic inequalities across HIV knowledge, attitudes, behaviours and prevention in 18 sub-Saharan African countries. *AIDS*. 2022; 36(6):871–9. <https://doi.org/10.1097/QAD.0000000000003191> PMID: 35190511
  20. Chirwa GC, Sithole L, Jamu E. Socio-economic Inequality in Comprehensive Knowledge about HIV in Malawi. *Malawi Med J*. 2019 Jun; 31(2):104–111. <https://doi.org/10.4314/mmj.v31i2.1> PMID: 31452842; PMCID: PMC6698630.
  21. Baker R, Camosso-Stefinovic J, Gillies C, Shaw EJ, Cheater F, Flottorp S, et al. Tailored interventions to address determinants of practice. *Cochrane Database of Systematic Reviews*. 2015(4). <https://doi.org/10.1002/14651858.CD005470.pub3> PMID: 25923419
  22. Swenson RR, Rizzo CJ, Brown LK, Venable PA, Carey MP, Valois RF, et al. HIV knowledge and its contribution to sexual health behaviors of low-income African American adolescents. *Journal of the National*

- Medical Association. 2010; 102(12):1173–82. [https://doi.org/10.1016/s0027-9684\(15\)30772-0](https://doi.org/10.1016/s0027-9684(15)30772-0) PMID: 21287898
23. Stormacq C, Wosinski J, Boillat E, Van den Broucke S. Effects of health literacy interventions on health-related outcomes in socioeconomically disadvantaged adults living in the community: a systematic review. *JBI Evid Synth.* 2020; 18(7):1389–469. <https://doi.org/10.11124/JBISRIIR-D-18-00023> PMID: 32813388
  24. UNAIDS. Global AIDS strategy 2021–2026: end inequalities. Geneva, Switzerland; 2021. Available from: [https://www.unaids.org/sites/default/files/media\\_asset/global-AIDS-strategy-2021-2026-summary\\_en.pdf](https://www.unaids.org/sites/default/files/media_asset/global-AIDS-strategy-2021-2026-summary_en.pdf).
  25. Evans DB, Hsu J, Boerma T. Universal health coverage and universal access. *Bull World Health Organ.* 912013. p. 546-a. <https://doi.org/10.2471/BLT.13.125450> PMID: 23940398
  26. Federal HIV/AIDS Prevention and Control Office. HIV/AIDS National Strategic Plan for Ethiopia 2021–2025. Addis Ababa, Ethiopia. Available from: <https://www.prepwatch.org/wp-content/uploads/2022/07/Ethiopia-HIVAIDS-National-Strategic-Plan-2021-25.pdf>
  27. Abate BB, Kassie AM, Reta MA, Ice GH, Haile ZT. Residence and young women's comprehensive HIV knowledge in Ethiopia. *BMC Public Health.* 2020; 20(1):1–10.
  28. Agegnehu CD, Tesema GA. Effect of mass media on comprehensive knowledge of HIV/AIDS and its spatial distribution among reproductive-age women in Ethiopia: a spatial and multilevel analysis. *BMC public health.* 2020; 20(1):1–12.
  29. Braveman P, Gottlieb L. The social determinants of health: it's time to consider the causes of the causes. *Public health reports.* 2014; 129(1\_suppl2):19–31. <https://doi.org/10.1177/00333549141291S206> PMID: 24385661
  30. World Population Prospects (2022 revision)—United Nations Population estimates and projections. Accessed 24 April 2023. Available from <https://worldpopulationreview.com/countries/ethiopia-population>.
  31. Worldometer. Ethiopia Population [cited 2023 15 June]. Available from: <https://www.worldometers.info/world-population/ethiopia-population/>.
  32. Foundation LI. The Legatum Prosperity Index: Creating the Pathways from Poverty to Prosperity [cited 2023, May 12]. Available from: <https://www.prosperity.com/globe/ethiopia>.
  33. Fenta EH, Sisay BG, Gebreyesus SH, Endris BS. Trends and causes of adult mortality from 2007 to 2017 using verbal autopsy method, Addis Ababa, Ethiopia. *BMJ Open.* 2021; 11(11). <https://doi.org/10.1136/bmjopen-2020-047095> PMID: 34785542
  34. UNAIDS. HIV and AIDS Estimates: Country fact sheets-Ethiopia 2022. [cited 2023 May 24]. Available from: <https://www.unaids.org/en/regionscountries/countries/ethiopia>.
  35. Central Statistical Agency [Ethiopia] and ORC Macro. Ethiopia Demographic and Health Survey 2005. Addis Ababa, Ethiopia and Calverton, Maryland, USA: Central Statistical Agency and ORC Macro; 2006. Available from: <https://dhsprogram.com/publications/publication-fr179-dhs-final-reports.cfm>.
  36. Central Statistical Agency [Ethiopia] and ICF International. Ethiopia Demographic and Health Survey 2011. Addis Ababa, Ethiopia and Calverton, Maryland, USA: Central Statistical Agency and ICF International; 2012. Available from: <https://dhsprogram.com/pubs/pdf/fr255/fr255.pdf>.
  37. Howe LD, Hargreaves JR, Huttly SR. Issues in the construction of wealth indices for the measurement of socio-economic position in low-income countries. *Emerging themes in epidemiology.* 2008; 5(1):1–14. <https://doi.org/10.1186/1742-7622-5-3> PMID: 18234082
  38. Vyas S, Kumaranayake L. Constructing socio-economic status indices: how to use principal components analysis. *Health policy and planning.* 2006; 21(6):459–68. <https://doi.org/10.1093/heapol/czl029> PMID: 17030551
  39. Kang H. The prevention and handling of the missing data. *Korean journal of anesthesiology.* 2013; 64(5):402–6. <https://doi.org/10.4097/kjae.2013.64.5.402> PMID: 23741561
  40. Van Kerm P, Jenkins SP. Generalized Lorenz curves and related graphs: an update for Stata 7. *The Stata Journal.* 2001; 1(1):107–12.
  41. Erreygers G. Correcting the concentration index. *Journal of health economics.* 2009; 28(2):504–15. <https://doi.org/10.1016/j.jhealeco.2008.02.003> PMID: 18367273
  42. O'Donnell O, O'Neill S, Van Ourti T, Walsh B. Conindex: estimation of concentration indices. *The Stata Journal.* 2016; 16(1):112–38. PMID: 27053927
  43. O'Donnell O, Van Doorslaer E, Wagstaff A, Lindelow M. *Analyzing Health Equity Using Household Survey Data: A Guide to Techniques and Their Implementation.* 2008, Washington, DC: World Bank. Washington.



44. Yiengprugsawan V, Lim LL, Carmichael GA, Dear KB, Sleigh AC. Decomposing socioeconomic inequality for binary health outcomes: an improved estimation that does not vary by choice of reference group. *BMC research notes*. 2010; 3(1):1–5.
45. Ackerson LK, Ramanadhan S, Arya M, Viswanath K. Social disparities, communication inequalities, and HIV/AIDS-related knowledge and attitudes in India. *AIDS and Behavior*. 2012; 16:2072–81. <https://doi.org/10.1007/s10461-011-0031-y> PMID: 21870161
46. Faust L, Yaya S, Ekholuenetale M. Wealth inequality as a predictor of HIV-related knowledge in Nigeria. *BMJ Global Health*. 2017; 2(4):e000461. <https://doi.org/10.1136/bmjgh-2017-000461> PMID: 29333285
47. García-Gofiñ M, Nuño-Solinís R, Orueta JF, Paolucci F. Is utilization of health services for HIV patients equal by socioeconomic status? Evidence from the Basque country. *Int J Equity Health*. 2015; 14:110. <https://doi.org/10.1186/s12939-015-0215-6> PMID: 26510922
48. Sheehy-Skeffington J. The effects of low socioeconomic status on decision-making processes. *Current Opinion in Psychology*. 2020; 33:183–8. <https://doi.org/10.1016/j.copsyc.2019.07.043> PMID: 31494518
49. Li X, Deng L, Yang H, Wang H. Effect of socioeconomic status on the healthcare-seeking behavior of migrant workers in China. *PLoS One*. 2020; 15(8):e0237867. <https://doi.org/10.1371/journal.pone.0237867> PMID: 32813702
50. Abuduxike G, Aşut Ö, Vaizoğlu SA, Cali S. Health-seeking behaviors and its determinants: a facility-based cross-sectional study in the Turkish Republic of Northern Cyprus. *International Journal of Health Policy and Management*. 2020; 9(6):240. <https://doi.org/10.15171/ijhpm.2019.106> PMID: 32613792
51. Estifanos TM, Hui C, Tesfai AW, Teklu ME, Ghebrehiwet MA, Embaye KS, et al. Predictors of HIV/AIDS comprehensive knowledge and acceptance attitude towards people living with HIV/AIDS among unmarried young females in Uganda: a cross-sectional study. *BMC Women's Health*. 2021; 21:1–13.
52. Teshale AB, Tesema GA. Socioeconomic Inequality in Knowledge About HIV and Its Contributing Factors Among Women of Reproductive Age in Sub-Saharan Africa: A Multicountry and Decomposition Analysis. *HIV AIDS (Auckl)*. 2023; 15:53–62. <https://doi.org/10.2147/HIV.S392548> PMID: 36883177
53. World Health Organization. HIV Testing and counselling: The gateway to treatment, care and support. World Health Organization; 2003. Available from: <https://apps.who.int/iris/handle/10665/68664>.
54. Okumu E, Jolly DH, Alston LM, Eley NT, Laws M, MacQueen KM. Relationship between human immunodeficiency virus (HIV) knowledge, HIV-related stigma, and HIV testing among young black adults in a southeastern city. *Frontiers in public health*. 2017; 5:47. <https://doi.org/10.3389/fpubh.2017.00047> PMID: 28349049
55. Kuehne A, Koschollek C, Santos-Hövenner C, Thorlie A, Müllerschön J, Mputu Tshibadi C, et al. Impact of HIV knowledge and stigma on the uptake of HIV testing—Results from a community-based participatory research survey among migrants from sub-Saharan Africa in Germany. *Plos one*. 2018; 13(4):e0194244. <https://doi.org/10.1371/journal.pone.0194244> PMID: 29641527
56. Atteraya M, Kimm H, Song IH. Caste- and ethnicity-based inequalities in HIV/AIDS-related knowledge gap: a case of Nepal. *Health & Social Work*. 2015; 40(2):100–7.
57. Agegnehu CD, Geremew BM, Sisay MM, Muchie KF, Engida ZT, Gudayu TW, et al. Determinants of comprehensive knowledge of HIV/AIDS among reproductive age (15–49 years) women in Ethiopia: further analysis of 2016 Ethiopian demographic and health survey. *AIDS Research and Therapy*. 2020; 17:1–9.
58. World Economic Forum. Global Gender Gap Report: Insights Report March 2021. Geneva, Switzerland: The World Economic Forum. Available from: [https://www3.weforum.org/docs/WEF\\_GGGR\\_2021.pdf](https://www3.weforum.org/docs/WEF_GGGR_2021.pdf).
59. Lailulo YA, Sathiya Susuman A, Blignaut R. Correlates of gender characteristics, health and empowerment of women in Ethiopia. *BMC women's health*. 2015; 15:1–9.
60. Pew Research Center. Men have greater access to the internet than women in many nations. Washington, USA: Pew Research Center; 2016 [cited 2023 August 2023]. Available from: <https://www.pewresearch.org/global/2016/02/22/internet-access-growing-worldwide-but-remains-higher-in-advanced-economies/>.
61. Göran D, Whitehead M. Policies and strategies to promote social equity in health. 1991.
62. Gao X, Wu Y, Zhang Y, Zhang N, Tang J, Qiu J, et al. Effectiveness of school-based education on HIV/AIDS knowledge, attitude, and behavior among secondary school students in Wuhan, China. 2012. <https://doi.org/10.1371/journal.pone.0044881> PMID: 22970322
63. Bertrand JT, Anhang R. The effectiveness of mass media in changing HIV/AIDS-related behaviour among young people in developing countries. Technical Report Series-World Health Organization. 2006; 938:205. PMID: 16921921
64. Kelly MP, Barker M. Why is changing health-related behaviour so difficult? *Public health*. 2016; 136:109–16. <https://doi.org/10.1016/j.puhe.2016.03.030> PMID: 27184821

65. West R, May S, West M, Croghan E, McEwen A. Performance of English stop smoking services in first 10 years: analysis of service monitoring data. *Bmj*. 2013;347. <https://doi.org/10.1136/bmj.f4921> PMID: [23963106](https://pubmed.ncbi.nlm.nih.gov/23963106/)
66. Herbst JH, Beeker C, Mathew A, McNally T, Passin WF, Kay LS, et al. The effectiveness of individual-, group-, and community-level HIV behavioral risk-reduction interventions for adult men who have sex with men: a systematic review. *American journal of preventive medicine*. 2007; 32(4):38–67. <https://doi.org/10.1016/j.amepre.2006.12.006> PMID: [17386336](https://pubmed.ncbi.nlm.nih.gov/17386336/)
67. Wenzl M, Naci H, Mossialos E. Health policy in times of austerity—A conceptual framework for evaluating effects of policy on efficiency and equity illustrated with examples from Europe since 2008. *Health Policy*. 2017; 121(9):947–54. <https://doi.org/10.1016/j.healthpol.2017.07.005> PMID: [28803706](https://pubmed.ncbi.nlm.nih.gov/28803706/)
68. Damtew Z, Lemma S, Zulliger R, Moges A, Teklu A, Perry H. Ethiopia's Health Extension Program. *Health for the People: National Community Health Programs from Afghanistan to Zimbabwe* Edited by Perry H Washington, DC, USA: USAID/Maternal and Child Survival Program. 2020:75–86.
69. Federal Ministry of Health (FMOH). Health Sector Strategic Plan (HSDP-III) 2005/6-2009/10 FMOH; 2005 [cited 2023 August 15]. Available from: [http://www.nationalplanningcycles.org/sites/default/files/planning\\_cycle\\_repository/ethiopia/ethiopia-health-sector-development-planhspd-iii.pdf](http://www.nationalplanningcycles.org/sites/default/files/planning_cycle_repository/ethiopia/ethiopia-health-sector-development-planhspd-iii.pdf).
70. World Health Organization. Optimizing community health worker programmes for HIV services: a guide for health policy and system support. Geneva: World Health Organization; 2021. Available from: <https://www.who.int/publications/i/item/9789240040168>.
71. Althubaiti A. Information bias in health research: definition, pitfalls, and adjustment methods. *Journal of multidisciplinary healthcare*. 2016;211–7. <https://doi.org/10.2147/JMDH.S104807> PMID: [27217764](https://pubmed.ncbi.nlm.nih.gov/27217764/)
72. Caruana EJ, Roman M, Hernández-Sánchez J, Solli P. Longitudinal studies. *Journal of thoracic disease*. 2015; 7(11):E537. <https://doi.org/10.3978/j.issn.2072-1439.2015.10.63> PMID: [26716051](https://pubmed.ncbi.nlm.nih.gov/26716051/)
